# Supplementary material
Source: publisher site journal article supplement (https://www.dovepress.com/article/454904)
Supplement: Supplementary file 1 [file get_supplementary_file.php]

Supplementary Table 1 Baseline characteristics of all participants according to RAR quartile

| Variables | Group 1 (n= 138) | Group 2 (n=138) | Group 3 (n= 137) | Group 4 (n= 138) | P-value |
| --- | --- | --- | --- | --- | --- |
| RAR | 2.93 (2.79, 2.99) | 3.19 (3.11, 3.26) | 3.52 (3.42, 3.61) | 4.22 (3.93, 4.70) | ＜0.001 |
| Age, years | 59.01±12.79 | 65.36±11.51 | 69.91±12.06 | 73.60±13.02 | ＜0.001 |
| Male, % | 113 (81.9%) | 107 (77.5%) | 101 (73.7%) | 98 (71.0%) | 0.166 |
| BMI, kg/m2 | 25.80±3.14 | 24.94±3.41 | 24.78±2.78 | 24.11±3.81 | 0.001 |
| SBP, mmHg | 129.46±19.96 | 131.57±21.15 | 128.65±24.23 | 142.36±105.03 | 0.150 |
| DBP, mmHg | 78.51±14.55 | 79.70±14.66 | 74.15±14.01 | 76.17±15.74 | 0.009 |
|  |  |  |  |  |  |
| NSTEMI, % | 48 (34.8%) | 80 (58.0%) | 85 (62%) | 83 (60.1%) | ＜0.001 |
| Hypertension, % | 88 (63.8%) | 93 (67.4%) | 88 (64.2%) | 104 (75.4%) | 0.142 |
| DM, % | 38 (27.5%) | 49 (35.5%) | 54 (39.4%) | 59 (42.8%) | 0.053 |
| CKD, % | 0 | 3 (2.2%) | 6 (4.4%) | 19 (13.8%) | ＜0.001 |
| Previous stroke, % | 20 (14.5%) | 30 (21.47%) | 48 (35.0%) | 57 (41.3%) | ＜0.001 |
| Anaemia, % | 3 (2.2%) | 9 (6.5%) | 20 (14.6%) | 68 (49.3%) | ＜0.001 |
| Killip III+IV | 10 (7.3%) | 11 (7.9%) | 22 (16.0%) | 42 (30.4%) | ＜0.001 |
| Leukocyte count, 109/L | 9.31 (7.76, 11.88) | 8.44 (6.86, 10.28) | 8.69 (6.52, 10.51) | 8.85 (7.13, 11.52) | 0.01 |
| Red blood cell, 109/L | 4.8±0.57 | 4.66±0.57 | 4.42±0.70 | 4.07±0.80 | ＜0.001 |
| Hemoglobin, g/L | 150.72±16.94 | 142.32±17.03 | 134.18±19.95 | 119.20±24.76 | ＜0.001 |
| RDW, % | 12.80 (12.50, 13.10) | 13.00 (12.70, 13.30) | 13.30 (23.85, 13.60) | 14.10 (13.40, 14.90) | ＜0.001 |
| TnI, ng/mL | 0.32 (0.04, 4.22) | 0.34 (0.06, 2.21) | 0.57 (0.11, 2.30) | 0.75 (0.17, 2.13) | 0.206 |
| D-dimer, mg/L | 0.30 (0.22, 0.46) | 0.40 (0.26, 0.66) | 0.60 (0.34, 1.08) | 0.90 (0.55, 1.60) | ＜0.001 |
| CRP, mg/L | 2.33 (1.12, 5.45) | 2.55 (1.03, 6.53) | 3.45 (1.37, 19.95) | 12.50 (3.69, 59.43) | ＜0.001 |
| Creatinine, μmo/l/L | 73.00 (62.75, 86.00) | 77.00 (63.00, 91.00) | 85.00 (71.50, 106.50) | 99.00 (77.00, 141.25) | ＜0.001 |
| eGFR, mL/min/1.73m2 | 100.27 (84.20, 108.66) | 90.53 (77.16, 102.84) | 78.92 (55.99, 95.77) | 12.50 (3.69, 59.43) | ＜0.001 |
| Uric acid, μmol/L | 366.32±110.86 | 362.90±108.00 | 378.37±133.28 | 413.19±153.81 | 0.012 |
| TG, mmol/L | 1.79 (1.18, 2.58) | 1.33 (1.05, 2.09) | 1.26 (0.95, 1.88) | 1.24 (0.89, 1.73) | ＜0.001 |
| TC, mmol/L | 4.61±1.20 | 4.11±1.09 | 4.03±1.30 | 3.91±1.27 | ＜0.001 |
| Albumin, g/dL | 4.45±0.25 | 4.09±0.20 | 3.79±0.22 | 3.31±0.38 | ＜0.001 |
| LVEF, % | 60.18±9.66 | 58.49±11.61 | 56.62±13.59 | 50.96±13.35 | ＜0.001 |
| CAG, % | 130 (94.2%) | 126 (91.3%) | 127 (92.7%) | 98 (71.0%) | ＜0.001 |
| Number of stents | 1.25±1.00 | 1.34±1.20 | 1.36±1.19 | 1.54±1.38 | 0.24 |
| Gensini Score | 70.00 (44.00, 88.00) | 74.00 (38.00, 108.25) | 66.00 (38.00, 94.00) | 66.00 (0,00 102.50) | 0.262 |
| Syntax score | 20.00 (14.50, 24.40) | 23.00 (17.00, 28.00) | 23.00 (17.00, 28.00) | 25.00 (19.50, 29.00) | ＜0.001 |
| Contrast agent, ml | 200.00 (100.00, 200.00) | 100.00 (100.00, 200.00) | 100.00 (100.00, 200.00) | 100.00 (0.00, 200.00) | ＜0.001 |
| Aspirin, % | 136 (98.6%) | 134 (97.1%) | 133 (97.1%) | 128 (92.8%) | 0.059 |
| Clopidogrel/ticagrelor, % | 135 (97.8%) | 131 (94.9%) | 134 (97.8%) | 127 (92.0%) | 0.055 |
| ACEI/ARB, % | 49 (35.5%) | 46 (33.3%) | 53 (38.7%) | 63 (45.7%) | 0.167 |
| Beta blockers, % | 106 (76.9%) | 99 (71.7%) | 90 (65.7%) | 98 (71.0%) | 0.243 |
| Statin, % | 133 (96.4%) | 135 (97.8%) | 136 (99.3%) | 134 (97.1%) | 0.505 |
| Hydration, % | 117 (84.8%) | 122 (88.4%) | 112 (81.8%) | 92 (66.7%) | ＜0.001 |
| Diuretic, % | 57 (41.3%) | 62 (44.9%) | 81 (59.1%) | 116 (84.1%) | ＜0.001 |
| Deaths in hospital, % | 2 (1.4%) | 5 (3.6%) | 6 (4.4%) | 15 (10.9%) | 0.003 |

*CRS-I, cardio-renal syndrome type I; RAR, red blood cell distribution width to albumin ratio; BMI, body mass index; SBP, systolic blood pressure; DBP, diastolic blood pressure; NSTEMI, non-ST elevation myocardial infarction; DM, diabetes mellitus; CKD, chronic kidney disease; LVEF, left ventricular ejection fraction; RDW, red blood cell distribution width; TnI, troponin I; CRP, C-reactive protein; Scr, serum creatinine; eGFR, estimated glomerular filtration rate; TG, triglyceride; TC, total cholesterol; LDL-C, low-density lipoprotein cholesterol; HDL-C, highdensity lipoprotein cholesterol; CAG, coronary angiography; ACEI, angiotensin-converting enzyme inhibitors; ARB, angiotensin receptor blockers.*

Supplementary Table 2 Univariate and multivariate analyses of patients with CRS-I after AMI

| Variables | Univariate analysis | | | Multivariate analysis | | | |
| --- | --- | --- | --- | --- | --- | --- | --- |
|  | OR value | 95% CI | P value | OR value | 95% CI | | P value |
| RAR | 2.625 | 1.934-3.563 | ＜0.001 | 1.693 | 1.114-2.575 | | 0.014 |
| Age | 1.039 | 1.020-1.058 | ＜0.001 | 1.007 | 0.985-1.031 | 0.527 | |
| Male | 0.480 | 0.302-0.762 | 0.002 | 0.573 | 0.324-1.011 | 0.055 | |
| BMI | 0.976 | 0.914-1.041 | 0.452 |  |  |  | |
| SBP | 1.000 | 0.996-1.004 | 0.903 |  |  |  | |
| DBP | 0.994 | 0.979-1.009 | 0.418 |  |  |  | |
| NSTEMI | 1.118 | 0.728-1.717 | 0.609 |  |  |  | |
| Hypertension | 2.261 | 1.337-3.823 | 0.002 | 1.826 | 0.979-3.407 | 0.058 | |
| DM | 2.170 | 1.407-3.349 | ＜0.001 | 1.752 | 1.046-2.934 | 0.033 | |
| CKD | 1.212 | 0.854-1.719 | 0.282 |  |  |  | |
| Previous stroke | 2.384 | 1.528-3.720 | ＜0.001 | 1.289 | 0.729-2.279 | 0.383 | |
| Anemia | 3.426 | 2.114-5.551 | ＜0.001 | 0.948 | 0.486-1.850 | 0.875 | |
| Atrial fibrillation | 1.488 | 0.648-3.414 | 0.349 |  |  |  | |
| Killip III+IV | 5.189 | 3.134-8.591 | ＜0.001 | 2.034 | 1.102-3.755 | 0.023 | |
| LVEF | 0.958 | 0.942-0.974 | ＜0.001 | 0.986 | 0.966-1.007 | 0.189 | |
| Leukocyte count | 1.146 | 1.073-1.224 | ＜0.001 | 1.118 | 1.031-1.213 | 0.007 | |
| Red blood cell | 0.553 | 0.410-0.746 | ＜0.001 |  |  |  | |
| Hemoglobin | 0.977 | 0.968-0.987 | ＜0.001 |  |  |  | |
| RDW | 1.636 | 1.370-1.953 | ＜0.001 |  |  |  | |
| TnI | 0.994 | 0.957-1.032 | 0.743 |  |  |  | |
| D-dimer | 1.000 | 1.000-1.000 | ＜0.001 | 1.000 | 1.000-1.000 | 0.823 | |
| CRP | 1.007 | 1.002-1.011 | 0.003 | 0.999 | 0.993-1.005 | 0.746 | |
| Scr | 1.014 | 1.010-1.019 | ＜0.001 |  |  |  | |
| eGFR, mL/min/1.73m2 | 0.965 | 0.957-0.973 | ＜0.001 |  |  |  | |
| Uric acid | 1.004 | 1.002-1.006 | ＜0.001 | 1.003 | 1.001-1.005 | 0.005 | |
| TG | 1.065 | 0.919-1.235 | 0.402 |  |  |  | |
| TC | 0.923 | 0.773-1.103 | 0.377 |  |  |  | |
| Albumin | 0.348 | 0.225-0.537 | ＜0.001 |  |  |  | |
| CAG, % | 0.294 | 0.171-0.505 | ＜0.001 | 0.968 | 0.276-3.399 | 0.959 | |
| Syntax score | 1.014 | 0.992-1.037 | 0.211 |  |  |  | |
| Contrast agent | 0.996 | 0.993-0.999 | 0.008 | 1.000 | 0.995-1.004 | 0.976 | |
| Aspirin | 0.263 | 0.106-0.652 | 0.004 | 0.497 | 0.148-1.672 | 0.259 | |
| Clopidogrel/ticagrelor | 0.541 | 0.218-1.341 | 0.185 |  |  |  | |
| ACEI/ARB | 1.255 | 0.812-1.938 | 0.306 |  |  |  | |
| Beta blockers | 1.095 | 0.678-1.769 | 0.711 |  |  |  | |
| Statin | 0.507 | 0.153-1.681 | 0.267 |  |  |  | |
| Hydration | 0.427 | 0.263-0.691 | 0.001 | 0.923 | 0.363-2.342 | 0.865 | |
| Diuretic | 4.116 | 2.420-7.002 | ＜0.001 | 1.869 | 0.965-3.618 | 0.064 | |

*CRS-I, cardio-renal syndrome type I; RAR, red blood cell distribution width to albumin ratio; BMI, body mass index; SBP, systolic blood pressure; DBP, diastolic blood pressure; NSTEMI, non-ST elevation myocardial infarction; DM, diabetes mellitus; CKD, chronic kidney disease; LVEF, left ventricular ejection fraction; RDW, red blood cell distribution width; TnI, troponin I; CRP, C-reactive protein; Scr, serum creatinine; eGFR, estimated glomerular filtration rate; TG, triglyceride; TC, total cholesterol; LDL-C, low-density lipoprotein cholesterol; HDL-C, highdensity lipoprotein cholesterol;* *CAG, coronary angiography; ACEI, angiotensin-converting enzyme inhibitors; ARB, angiotensin receptor blockers.*

Supplementary Table 3 Collinearity analysis of baseline data with RAR.

|  | Unstandardized Coefficients | | Standardized Coefficients | t | | Sig | Collinearity Statistics | |
| --- | --- | --- | --- | --- | --- | --- | --- | --- |
|  | B | Std. Error | Beta | Tolerance | VIF |
| (Constant) | -0.490 | 0.462 |  | | -1.060 | 0.290 |  |  |
| Age | 0.000 | 0.002 | -0.013 | -0.202 | | 0.840 | 0.374 | 2.672 |
| Male | -0.112 | 0.046 | -0.123 | -2.416 | | 0.016 | 0.561 | 1.781 |
| BMI | 0.000 | 0.005 | 0.000 | -0.009 | | 0.993 | 0.776 | 1.289 |
| SBP | 0.001 | 0.001 | 0.030 | 0.549 | | 0.583 | 0.484 | 2.066 |
| DBP | 0.000 | 0.001 | 0.010 | 0.185 | | 0.854 | 0.475 | 2.104 |
| Hypertension | 0.035 | 0.035 | 0.042 | 0.992 | | 0.322 | 0.816 | 1.225 |
| DM | 0.059 | 0.033 | 0.073 | 1.767 | | 0.078 | 0.858 | 1.166 |
| CKD | 0.078 | 0.076 | 0.044 | 1.025 | | 0.306 | 0.783 | 1.278 |
| Previous stroke | 0.037 | 0.038 | 0.042 | 0.975 | | 0.330 | 0.764 | 1.308 |
| Anemia | -0.001 | 0.061 | -0.001 | -0.016 | | 0.987 | 0.399 | 2.506 |
| Killip III+IV | 0.121 | 0.047 | 0.113 | 2.568 | | 0.010 | 0.748 | 1.337 |
| LVEF | -0.002 | 0.001 | -0.059 | -1.308 | | 0.191 | 0.716 | 1.397 |
| CAG | 0.011 | 0.081 | 0.009 | 0.131 | | 0.896 | 0.297 | 3.361 |
| Leukocyte count | 0.014 | 0.006 | 0.116 | 2.575 | | 0.010 | 0.717 | 1.395 |
| RBC | -0.053 | 0.063 | -0.099 | -0.843 | | 0.399 | 0.104 | 9.599 |
| Hemoglobin | 0.003 | 0.002 | 0.163 | 1.183 | | 0.237 | 0.076 | 13.098 |
| RDW | 0.045 | 0.017 | 0.135 | 2.621 | | 0.009 | 0.547 | 1.827 |
| TnI | -0.001 | 0.003 | -0.008 | -0.206 | | 0.837 | 0.885 | 1.130 |
| D-dimer | 0.000 | 0.000 | 0.029 | 0.619 | | 0.536 | 0.649 | 1.542 |
| CRP | 0.000 | 0.000 | -0.014 | -0.312 | | 0.755 | 0.748 | 1.336 |
| Scr | 0.001 | 0.001 | 0.122 | 1.238 | | 0.216 | 0.148 | 6.749 |
| eGFR | -0.001 | 0.002 | -0.069 | -0.624 | | 0.533 | 0.120 | 8.357 |
| Uric acid | 0.000 | 0.000 | 0.049 | 1.023 | | 0.307 | 0.633 | 1.580 |
| Albumin | -0.031 | 0.038 | -0.040 | -0.823 | | 0.411 | 0.601 | 1.665 |
| Contrast agent | 0.000 | 0.000 | -0.023 | -0.426 | | 0.670 | 0.515 | 1.943 |
| Aspirin | -0.109 | 0.092 | -0.052 | -1.188 | | 0.235 | 0.741 | 1.350 |
| Hydration | -0.025 | 0.056 | -0.026 | -0.449 | | 0.653 | 0.441 | 2.266 |
| Diuretic | 0.044 | 0.036 | 0.056 | 1.222 | | 0.222 | 0.682 | 1.465 |

*CRS-I, cardio-renal syndrome type I; RAR, red blood cell distribution width to albumin ratio; BMI, body mass index; SBP, systolic blood pressure; DBP, diastolic blood pressure; NSTEMI, non-ST elevation myocardial infarction; DM, diabetes mellitus; CKD, chronic kidney disease; LVEF, left ventricular ejection fraction; CAG, coronary angiography; RDW, red blood cell distribution width; TnI, troponin I; CRP, C-reactive protein; Scr, serum creatinine; eGFR, estimated glomerular filtration rate;*


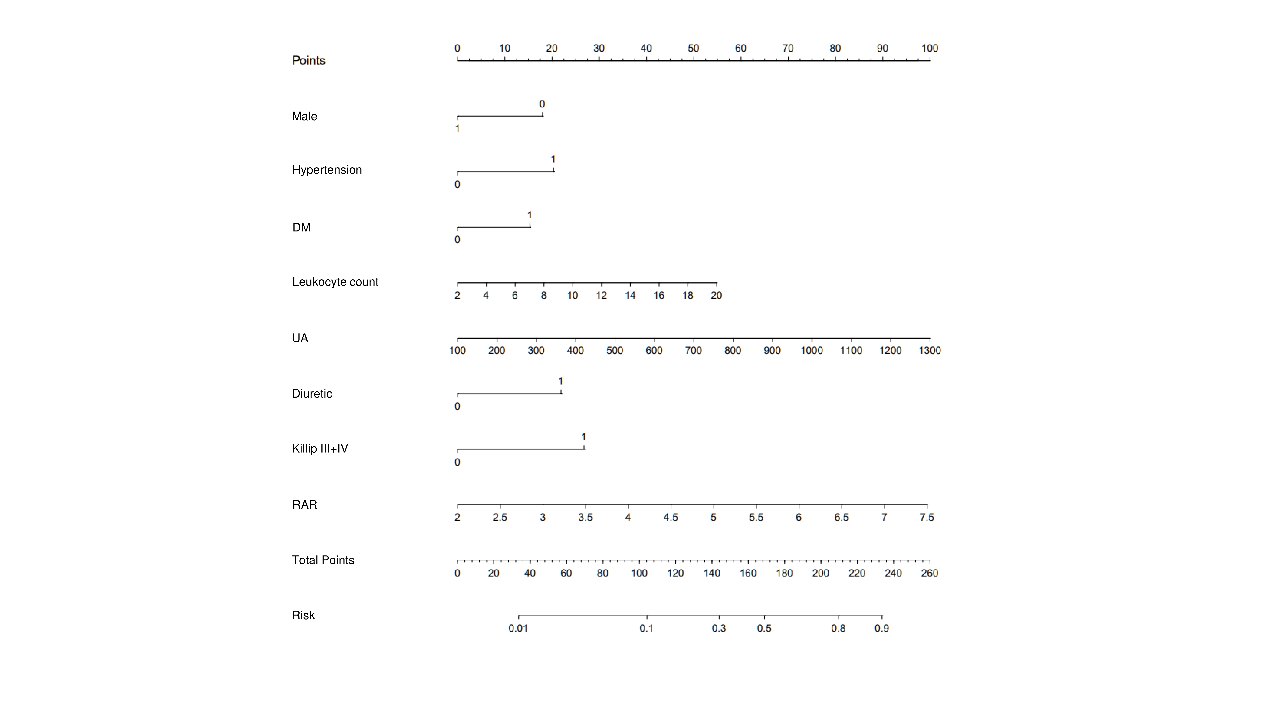


Supplementary figure 1: The nomogram for predicting the risk of CRS-I in patients with AMI. Each level of predictor indicates a certain score. A total score was generated by a summary of the score of each predictor. The total score corresponds to CRS-I probability. *DM, diabetes mellitus; UA, Uric acid; RAR, red blood cell distribution width to albumin ratio;*


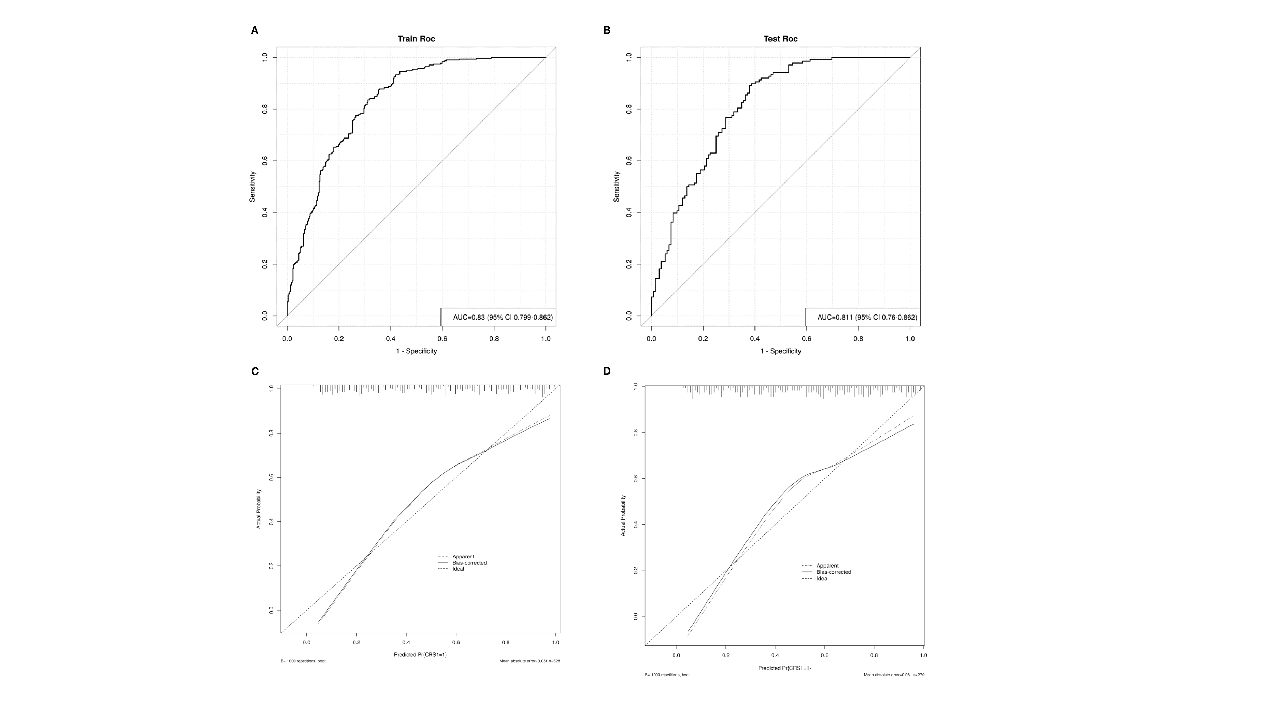


Supplementary figure 2: The ROC curve and calibration for train set and test set.

Supplementary figure 2A: The ROC curve for train set.

Supplementary figure 2B: The calibration for train set.

Supplementary figure 2C: The ROC curve for test set.

Supplementary figure 2D: The calibration for test set.
